# Supplementary material
Source: PubMed Central journal article supplement (PMC3135937)
Supplement: supp_pp.111.178012_178012Figure_S3.pdf [file supp_pp.111.178012_178012Figure_S3.pdf]

# Figure S3

## A.

### BLAST results of tobravirus primers PCR product

|        |     |      |                                                               |      |
|--------|-----|------|---------------------------------------------------------------|------|
| PCR    | Seq | 1    | ATAAACAAAGAGAAATGCAGAGGCAGAGCTTTTTGAAGAGTTTCAGGGATAACGCAACGA  | 60   |
| L23972 |     | 642  | ATAAACAAAGAGAAATGCAGAGGCAGAGCTTTTTGAAGAGTTTCAGGGATAACGCAACGA  | 701  |
| PCR    | Seq | 61   | CTTCCGACTCGGTCGTCAGTATGCGCAGTATGAGATGTATAATGCATTCAAGAATGGTG   | 120  |
| L23972 |     | 702  | CTTCCGACTCGGTCGTCAGTATGCGCAGTATGAGATGTATAATGCATTCAAGAATGGTG   | 761  |
| PCR    | Seq | 121  | TGGATAAACCTAATTTTGTAGGTGTAACAACACTTTCCAAGATTGCAATTGCAGGGGTT   | 180  |
| L23972 |     | 762  | TGGATAAACCTAATTTTGTAGGTGTAACAACACTTTCCAAGATTGCAATTGCAGGGGTT   | 821  |
| PCR    | Seq | 181  | ATACTAAAGATGGATTGCGGCGCGTGCAGAACATGCAATCGCTCTCCATAGTTTGTATG   | 240  |
| L23972 |     | 822  | ATACTAAAGATGGATTGCGGCGCGTGCAGAACATGCAATCGCTCTCCATAGTTTGTATG   | 881  |
| PCR    | Seq | 241  | ACTTCGAGCTCGACAGCGTGGCAGACGCTATGATCGAAAAGAAGACGAAATTCCTGCACG  | 300  |
| L23972 |     | 882  | ACTTCGAGCTCGACAGCGTGGCAGACGCTATGATCGAAAAGAAGACGAAATTCCTGCACG  | 941  |
| PCR    | Seq | 301  | CAGCTATGCTTTTCGCACCTGAGGCAATTATGATAGAGGAAGGTCCACTACCTGATGTTA  | 360  |
| L23972 |     | 942  | CAGCTATGCTTTTCGCACCTGAGGCAATTATGATAGAGGAAGGTCCACTACCTGATGTTA  | 1001 |
| PCR    | Seq | 361  | ATGGTTACTACCACAGAGTGCAAAAAGAATCTTGGAAC TAGGCCGAGAGAATTATGTTTG | 420  |
| L23972 |     | 1002 | ATGGTTACTACCACAGAGTGCAAAAAGAATCTTGGAAC TAGGCCGAGAGAATTATGTTTG | 1061 |
| PCR    | Seq | 421  | GTTTTACGACGACCCCTCCATAATTATATTCACACCTGGTCTGAGTATAAAAAATACT    | 480  |
| L23972 |     | 1062 | GTTTTACGACGACCCCTCCATAATTATATTCACACCTGGTCTGAGTATAAAAAATACT    | 1121 |
| PCR    | Seq | 481  | TATTAGGAAAATCTTTTGTTCGACGTGGCCATACTTTCTTCTTTGAGCCGTGGCAGAGTA  | 540  |
| L23972 |     | 1122 | TATTAGGAAAATCTTTTGTTCGACGTGGCCATACTTTCTTCTTTGAGCCGTGGCAGAGTA  | 1181 |
| PCR    | Seq | 541  | GAGGAGATACGATGTTCTTTACATTGTATAGGATGACTAATGTTCCAGAACTGGCTTGT   | 600  |
| L23972 |     | 1182 | GAGGAGATACGATGTTCTTTACATTGTATAGGATGACTAATGTTCCAGAACTGGCTTGT   | 1241 |
| PCR    | Seq | 601  | TTGGAGAAGAGTATTACAGGAGGTTGTACATTAAGAGTGGGCTGGAATGGTGATTGCGC   | 660  |
| L23972 |     | 1242 | TTGGAGAAGAGTATTACAGGAGGTTGTACATTAAGAGTGGGCTGGAATGGTGATTGCGC   | 1301 |
| PCR    | Seq | 661  | CGGTC TTC 668                                                 |      |
| L23972 |     | 1302 | CGGTC TTC 1309                                                |      |

### BLAST results of PepRSV 29K ORF

|            |  |      |                                                                  |       |
|------------|--|------|------------------------------------------------------------------|-------|
| PepRSV-29K |  | 1    | ATGGAGAACGATAAGTCGTTAGTTGCTTTGAAGAAGAAGACTTTTGAATTGTCTAACTTT     | 60    |
| L23972     |  | 5415 | ATGGAGAACGATAAGTCGTTAGTTGCTTTGAAGAAGAAGACTTTTGAATTGTCTAACTTT     | 5474  |
| PepRSV-29K |  | 61   | AGTAGGTTGGGTTTCGGTCGAGTTGTTTCGTCGATTC AAAAAAGAAAGAGACCGAAGTACTTT | 120   |
| L23972     |  | 5475 | AGTAGGTTGGGTTTCGGTCGAGTTGTTTCGTCGATTC AAAAAAGAAAGAGACCGAAGTACTTT | 5534  |
| PepRSV-29K |  | 121  | CACAGACGTAGGCAGGTTGTTTTGAATAATGTAGCAGGCTCTTAACTGAACACAAGTTA      | 180   |
| L23972     |  | 5535 | CACAGACGTAGGCAGGTTGTTTTGAATAATGTAGCAGGCTCTTAACTGAACACAAGTTA      | 5594  |
| PepRSV-29K |  | 181  | GGTGCTTTCAAAGTAGAAGATGTTGGAAGAATCAAGAGTTATGCCTTCTTGAGGATCGTA     | 240   |
| L23972     |  | 5595 | GGTGCTTTCAAAGTAGAAGATGTTGGAAGAATCAAGAGTTATGCCTTCTTGAGGATCGTA     | 5654  |
| PepRSV-29K |  | 241  | GCAATTCAACTTGTGTGTCTTCGCATTTACCTAGGGATACCCCTGGGCACTTGCAAGTT      | 300   |
| L23972     |  | 5655 | GCAATTCAACTTGTGTGTCTTCGCATTTACCTAGGGATACCCCTGGGCACTTGCAAGTT      | 57134 |
| PepRSV-29K |  | 301  | GACATTTTGGATACTCGTCTTACGGATGGGAGAAAGAAAAACAAGGCTTTCAGAGGTTTC     | 360   |
| L23972     |  | 5715 | GACATTTTGGATACTCGTCTTACGGATGGGAGAAAGAAAAACAAGGCTTTCAGAGGTTTC     | 5774  |

|            |      |                                                               |      |
|------------|------|---------------------------------------------------------------|------|
| PepRSV-29K | 361  | ATGGCCAAAGCCTGTGATAACACTTCTTTGATTTCAGTATAAGTTCGATTACTGCGTGAGT | 420  |
| L23972     | 5775 | ATGGCCAAAGCCTGTGATAACACTTCTTTGATTTCAGTATAAGTTCGATTACTGCGTGAGT | 5834 |
| PepRSV-29K | 420  | ACCAGCGAAAATCTTGCGGACCTTTGGCACATTGGTACAGTGGCTACTGGAGTACCAGTT  | 480  |
| L23972     | 5834 | ACCAGCGAAAATCTTGCGGACCTTTGGCACATTGGTACAGTGGCTACTGGAGTACCAGTT  | 5894 |
| PepRSV-29K | 481  | GTAGATGGTTGTTTCCCGTTTAGTGTAGAAATGTCTTTAATTTGGGTTGCTACTGATTTCG | 540  |
| L23972     | 5894 | GTAGATGGTTGTTTCCCGTTTAGTGTAGAAATGTCTTTAATTTGGGTTGCTACTGATTTCG | 5954 |
| PepRSV-29K | 541  | ACTACTCGGTTAAATCCTGAAGAGCTGAACAGTACCGATTATTTAGAAAGGTGACTTTAGT | 600  |
| L23972     | 5955 | ACTACTCGGTTAAATCCTGAAGAGCTGAACAGTACCGATTATTTAGAAAGGTGACTTTAGT | 6014 |
| PepRSV-29K | 601  | GATCAGAGTCAATTTGAAGAGTATATGAGCTTAAATCAAGTCAAAGCGAAAAGCGATTGAT | 660  |
| L23972     | 6015 | GATCAGAGTCAATTTGAAGAGTATATGAGCTTAAATCAAGTCAAAGCGAAAAGCGATTGAT | 6074 |
| PepRSV-29K | 661  | GTCAAGTTCAAAGGTGAGTATGTGCCTAAACTTAGGCAGGATAGAAATTTGGCTTCGTTA  | 720  |
| L23972     | 6075 | GTCAAGTTCAAAGGTGAGTATGTGCCTAAACTTAGGCAGGATAGAAATTTGGCTTCGTTA  | 6134 |
| PepRSV-29K | 721  | GAAAAGATTCCGCAGTCAATTTGTGAAAGCGCAAGCATAAAGAAAAAA              | 768  |
| L23972     | 6135 | GAAAAGATTCCGCAGTCAATTTGTGAAAGCGCAAGCATAAAGAAAAAA              | 6182 |

**BLAST results of PepRSV 12K ORF**

|            |      |                                                               |      |
|------------|------|---------------------------------------------------------------|------|
| PepRSV-12K | 1    | ATGACGAAGTGTGCTCTACCTGAATGTGAAGAAAATACTCAGAAGAATCAGATGACCTGT  | 60   |
| L23972     | 6182 | ATGACGAAGTGTGCTCTACCTGAATGTGAAGAAAATACTCAGAAGAATCAGATGACCTGT  | 6241 |
| PepRSV-12K | 61   | TCAATGAAACATGCTAATAAATAATAATAGGTATTTAGCTAGTAAGTTCGATGTAAAAAGA | 120  |
| L23972     | 6242 | TCAATGAAACATGCTAATAAATAATAATAGGTATTTAGCTAGTAAGTTCGATGTAAAAAGA | 6301 |
| PepRSV-12K | 121  | AAATGCGAGTGCAAGAACTGTGGTTGGTTTCCCTGCGATATCAGTTCAACCTGATTACGTG | 180  |
| L23972     | 6302 | AAATGCGAGTGCAAGAACTGTGGTTGGTTTCCCTGCGATATCAGTTCAACCTGATTACGTG | 6361 |
| PepRSV-12K | 181  | GAAGTCTACTTCTGTGTGGCATGAAGCATTTACAAAAGTGCAAAACCGATAATCCTTTA   | 240  |
| L23972     | 6362 | GAAGTCTACTTCTGTGTGGCATGAAGCATTTACAAAAGTGCAAAACCGATAATCCTTTA   | 6421 |
| PepRSV-12K | 241  | AAGGAGAAACGGTTGAACACACCAAAAAGACTGTTTAGAGATGATGTAGATTTTGGTCTT  | 300  |
| L23972     | 6422 | AAGGAGAAACGGTTGAACACACCAAAAAGACTGTTTAGAGATGATGTAGATTTTGGTCTT  | 6481 |
| PepRSV-12K | 301  | AATTTACTGTTTAGTGAGGTGTGT                                      | 324  |
| L23972     | 6482 | AATTTACTGTTTAGTGAGGTGTGT                                      | 6505 |

**B.**

Sequence alignment of tobavirus primers PCR product versus *Tobacco rattle virus* (TRV)

|                |     |     |                                                               |     |
|----------------|-----|-----|---------------------------------------------------------------|-----|
| PCR            | Seq | 1   | ATAAACAAAGAGAAATGCAGAGGCAGAGCTTTTGAAGAGTTTCAGGGATAACGCAACGA   | 60  |
| TRV (HM195288) |     | 622 | ACGATCAGAGAGAAATTTCTCGGCAGATATTTCTAACTGCAATTGGCGATCAGCCAGGA   | 681 |
| PCR            | Seq | 61  | CT--TCCGACTCGGTCGTCACATGATGCGCAGTATGAGATGTATAATGCATTCAAGAATGG | 118 |
| TRV (HM195288) |     | 682 | GTGGTAAGAGACAGATGTCGGAGAA-CGAGCTGTG-GATGTACGATCAATTTCCGAGAGAA | 739 |
| PCR            | Seq | 119 | TGTGGATAAACCTAATTTTGTAGGTGTAACAACACTTTCCAAGATTGCAATTGCAGGGG   | 178 |
| TRV (HM195288) |     | 740 | TATTACCGCACCTAACGCTGTTAGGTGTAATAATACATATCAAGTTGTACATGTAGAGG   | 799 |
| PCR            | Seq | 179 | TTATACTAAAGATGGATTGCGCGCGGTCGAGAACATGCAATCGCTCTCCATAGTTTGT    | 238 |
| TRV (HM195288) |     | 800 | ATTTTCT--GATGGTAAGAAGAAAGGTGCGCAGTATGCTATTGCTTTACATAGTTTGT    | 856 |
| PCR            | Seq | 239 | TGACTTCGAGCTCGACAGCGTGGCAGACGCTATGATCGAAAAGAAGACGAAATTCCTGCA  | 298 |
| TRV (HM195288) |     | 857 | TGACTTCAAGTTGAAAGACTTGATGCTACAATGGTTGAGAAAAGACAAAAGTGGTACA    | 916 |

|                |      |                                                              |      |
|----------------|------|--------------------------------------------------------------|------|
| PCR Seq        | 299  | CGCAGCTATGCTTTTCGCACCTGAGGCAATTATGATAGAGGAAGGTCCACTACCTGATGT | 358  |
| TRV (HM195288) | 917  | TGCTGCTATGCTTTTCTCCTGAGAGTATGCTAGTGGACGAGGGTCCATTACCTTCTGT   | 976  |
| PCR Seq        | 359  | TAATGGTTACTACCACAGAGTGCAAAGAATCTTGGAAC TAGGCCGAGAGAATTATGTT  | 418  |
| TRV (HM195288) | 977  | TGATGGTTACTACA-----TGAAAAAGAAT-----GGGAAGATCTACTT            | 1015 |
| PCR Seq        | 419  | TGGTTTTTCACGACGCCCTTCTATAATTATATTTACACCTGGTCTGAGTATAAAAAATA  | 478  |
| TRV (HM195288) | 1016 | CGGTTTCGAAAAGGATCCTTCTTTTCTTATATTCATGATTGGGAAGAGTACAAGAAATA  | 1075 |
| PCR Seq        | 479  | CTTATTAGGAAAATCTTTTGTTCGACGTGGCCATACTTCTTCTTTGAGCCGTGGCAGAG  | 538  |
| TRV (HM195288) | 1076 | TCTACTGGGAAAGCCAGTGAGTTACCAAGGGAACGTGTTCTACTTCGAACCGTGGCAAGT | 1135 |
| PCR Seq        | 539  | TAGAGGAGATACGATGTTCTTTACATTGTATAGGATGACTAATGTTCCAGAACTGGCTT  | 598  |
| TRV (HM195288) | 1136 | GAGAGGAGATACAATGCTATTTTCAATCTACAGGATAGCTGGAGTTCGAGG-CGGTCTC  | 1194 |
| PCR Seq        | 599  | GTTTGG-AGAAGAGTATTACAGGAGTGTACATTTAAAGTGGGCTGGAATGGTGATTG    | 657  |
| TRV (HM195288) | 1193 | TTTCATCACAAGAGTACTACCGAAGAATATATATCAGTAGATGGGAAAACATGGTTGTTG | 1254 |
| PCR Seq        | 658  | CGCCGGTCTTC 668                                              |      |
| TRV (HM195288) | 1255 | TCCCGATTTTC 1265                                             |      |

Sequence alignment of PepRSV 29K ORF versus Tobacco rattle virus (TRV)

|                |      |                                                                 |      |
|----------------|------|-----------------------------------------------------------------|------|
| PepRSV-29K     | 1    | ATGGAGAACGATAAGTCGTTAGTTGCTTTGAAGAAGAAGACTTTTGAATTGCTCTAACTTT   | 60   |
| TRV (HM195288) | 5297 | ATGGAA--GACAAGTCATTGGTTACGCTTAAGAAGAAGACTTTCGAAGTTTCGAAGTTT     | 5353 |
| PepRSV-29K     | 61   | AGTAGGTTGGGTTCCGGTCGAGTTGTTTCGTCGATTCAAAAAGAAAGAGACCGAAGTACTTT  | 120  |
| TRV (HM195288) | 5354 | TCGAACTTAGGTGCTATTGAACTGTTTGTGGATGGTAGGAGAAAGAGACCGAAGTATTTT    | 5413 |
| PepRSV-29K     | 121  | CACAGACGTAGGCAGGTTGTTTTGAATAATGTAGCAGGCTCTTAACTGAACACAAGTTA     | 180  |
| TRV (HM195288) | 5414 | CATAGAAGAAGAGAGACTGTCCATAATCATGTTGGTGAAAGAAGAGTGAACATAAGTTA     | 5473 |
| PepRSV-29K     | 181  | GGTGTCTTCAAAGTAGAAGATGTTGGAAGAATCAAGAGTTATGCCTTCTTGAGGATCGTA    | 240  |
| TRV (HM195288) | 5474 | GACGTTTTTGATCAGAGGGACTACAAAATGATTAATCTTACGCGTTTTTGAAGATAGTA     | 5533 |
| PepRSV-29K     | 241  | GCAATTCAACTTGTTGTGTCTTCGCATTACCTAGGGATACCCCTGGGCACTTGCAGGTT     | 300  |
| TRV (HM195288) | 5534 | GGTGTGCAACTTGTTGTGTACATCACATCTACCTGCAGATACGCTGGGTTTTATTCAAATC   | 5593 |
| PepRSV-29K     | 301  | GACATTTTGATACCTCGTCTTACGGATGGGAGAAAAGAAAACAAGGTCTTGCAAGGTTT     | 360  |
| TRV (HM195288) | 5594 | GATCTGTTGGATTCGAGACTTACTGAGAAAAGAAAAGAAAGACTATTCAGAGATTC        | 5653 |
| PepRSV-29K     | 361  | ATGGCCAAAGCCTGTGATAACACTTCTTTGATTGATTAGTATAAGTTCGATTACTGCGTGAGT | 420  |
| TRV (HM195288) | 5654 | AAAGCTCGAGCTTGCATAAATTGTTTCAAGTTCGCGAGTACAAGGTTGAATACAGTATTTCT  | 5713 |
| PepRSV-29K     | 421  | ACCAGCGAAAATCTTGCAGACCTTGGCACATTTGGTACAGTGGCTACTGGAGTACCAGTT    | 480  |
| TRV (HM195288) | 5714 | ACACAAGAGAATGTACTCGATGTCTGGAAGGTGGGTTGTATTTCTGAAGGCTTCCGGTC     | 5773 |
| PepRSV-29K     | 481  | GTAGATGGTTGTTTCCCGTTTAGTGTAGAAAATGCTTTAATTTGGGTTGCTACTGATTG     | 540  |
| TRV (HM195288) | 5774 | TGTGACGGTACATAACCCTTTCAGTATTGAAGTGTGCTCATTGGGTTGCTACTGATTG      | 5833 |
| PepRSV-29K     | 541  | ACTACTCGGTTAAATCCTGAAGAGCTGAACAGTACCGATTATTTAGAAGGTGACTTTAGT    | 600  |
| TRV (HM195288) | 5834 | ACTAGGCGTCTTAATGTGGAAGAAGTGAACAGTTCAGATTACATTGAAGGCGATTTTACC    | 5893 |
| PepRSV-29K     | 601  | GATCAGAGTCAATTTGAAGAGTATATGAGCTTAAATCAAGTCAAAGCGAAAGCGATTGAT    | 660  |
| TRV (HM195288) | 5894 | GATCAGGAGGTTTTCCGGTGGATTTCATGCTTTGAAACAAGTTGAGATGAAGACGATTGAG   | 5953 |
| PepRSV-29K     | 661  | GTCAAGTTCAAAGGTGAGTATGTGCTTAAACTTAGGCAGGATAGAAAAT--TTGGCTTCGT   | 718  |
| TRV (HM195288) | 5954 | GCGAAGTATGACGGTCTTACAGACC--AGCTACTACTAGACCAAAATCATTTGTTGTCGA    | 6013 |
| PepRSV-29K     | 719  | TAGAAAAGATTCCGCA--GTCAATTGTGAAAG--CGGC--AAGCATAAAGAAAAA         | 768  |
| TRV (HM195288) | 6014 | GTGAAGATGTTAAGGGAGCGTCTAAAAGAAAAACTCGTCTTAATGCATAAAGAAATTT      | 6072 |

Sequence alignment of PepRSV 12K ORF versus *Tobacco rattle virus* (TRV)

```

PepRSV-12K      1  ATGACGAAGTGTGCTCTACCTGAATGTGAA-GAAAATACTCAGAAGAATCAGATGACCTG  59
TRV (HM195288) 6058 ATGACGT-GTGTACTCAAGGGTTGTGTGAATGAAGTCACTGTTCTTGGTCACGAGACGTG
PepRSV-12K      60  TTCAATGAAACATGCTAATAAATAATAATAGGTATTTAGCTAGTAAGTTCGATGTAAAAAG  119
TRV (HM195288) 6059 TTGTATGGTCATGCTAACAAGTTGCCGAAAGCAAGTTGCTGACATGGTTGGTGTACGCG
PepRSV-12K      120 AAAATGCGAGTGCAAGAAGTGTGGTTGGTTT-CCTGCGATATCAGTTCAACCTGATTACG  178
TRV (HM195288) 6060 TAGGTGTGCGGAAAATAATGTGGATGGTTGTCTGTGTTGTTA--TCAATGATTTTACT
PepRSV-12K      179 TG-GAAGTCTACTTCTGTTGTGGCATGAAGCATTTACAAAAGTG-----CAA  225
TRV (HM195288) 6061 TTTGATGTGTATAATTGTGTGGCCGTAGTCACCTTGAAAAGTGTCTGTAAGCGTGTGCGAA
PepRSV-12K      226 ACCGATAATCCTTTAAAGGAGAAACGGTTGAACACAC-CAAAAAGACT-GTTTAGAGATG  283
TRV (HM195288) 6062 GCGAGAAATCGAGAAGTCTGGAACAGATTC AACGAGCTCGGAAAAGATACGTTTGTACAG
PepRSV-12K      284 ATGTAGATTTTGGTCTT--AATTTACTGTTTAGTGAG-GTGTGT  324
TRV (HM195288) 6063 CTAAAAGTCTCATAATTGAAATCCCAAAAAGGGAGAGAGAAT

```

Figure S3. (A) Sequence alignment of PepRSV sequences. 668 nucleotides of sequence was obtained after sequencing a PCR product amplified using generic tobnavirus primers from reverse-transcribed RNA extracted from PVX 2.7-infected *Arabidopsis*. The top BLAST hit is shown (accession number L23972), which corresponds to the *Pepper ringspot virus* RNA1 genome sequence. Sequence alignments are shown between the published PepRSV sequence (JF268315) and the sequences amplified from *N. benthamiana* infected with PVX 2.7-derived PepRSV with either PRSV29KXbaI.R+PRSV29KBamH.R (PepRSV-29K ORF) or PRSV12KXbaI.F+PRSV12KBamHI (PepRSV-12K ORF). Mismatches are boxed in black. (B) The same sequences used in (A) were aligned with their corresponding regions in *Tobacco rattle virus* (TRV: accession number HM195288). Overall identity in these regions was found to be 55%, 62% and 54% respectively, for the RNA1 PCR product, the 29K ORF and the 12K ORF sequences.
